# Supplementary material for: Quantitative Differences in Nuclear β-catenin and TCF Pattern Embryonic Cells in C. elegans
Source: PubMed Central journal article supplement (PMC4619327; doi:10.1371/journal.pgen.1005585), 2015-10-21

**Figure S2: Full lineages for nuclear  $\beta$ -catenin and POP-1 localization**

**A** Mean nuclear  $\beta$ -catenin levels for GFP::WRM-1 and Venus::SYS-1 across all wild-type embryos, 600 cell stage

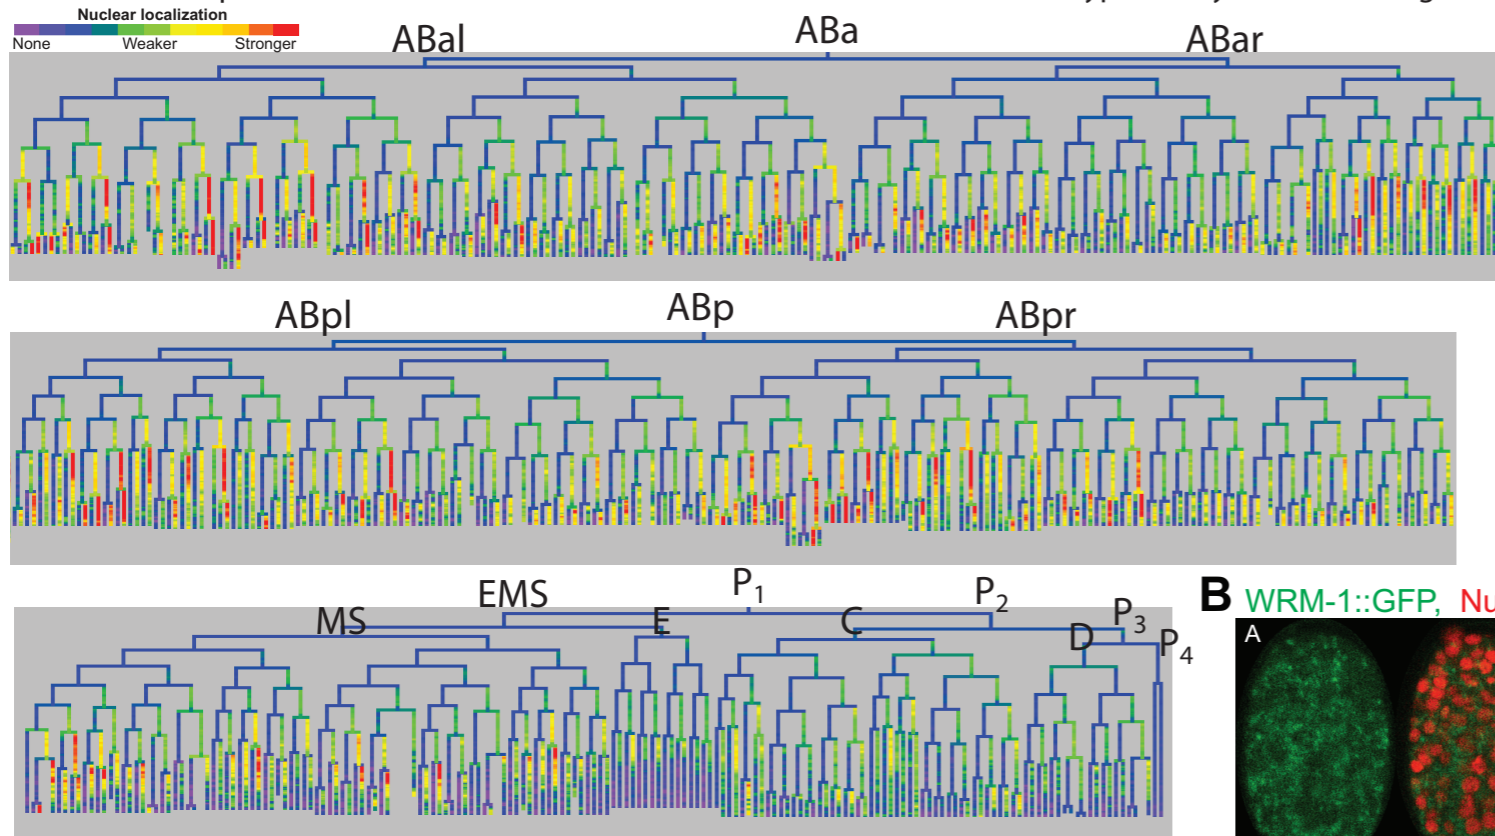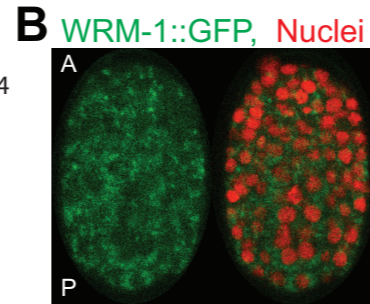

**C** Mean nuclear  $\beta$ -catenin levels for mCherry::SYS-1 across all wild-type embryos, 350 cell stage

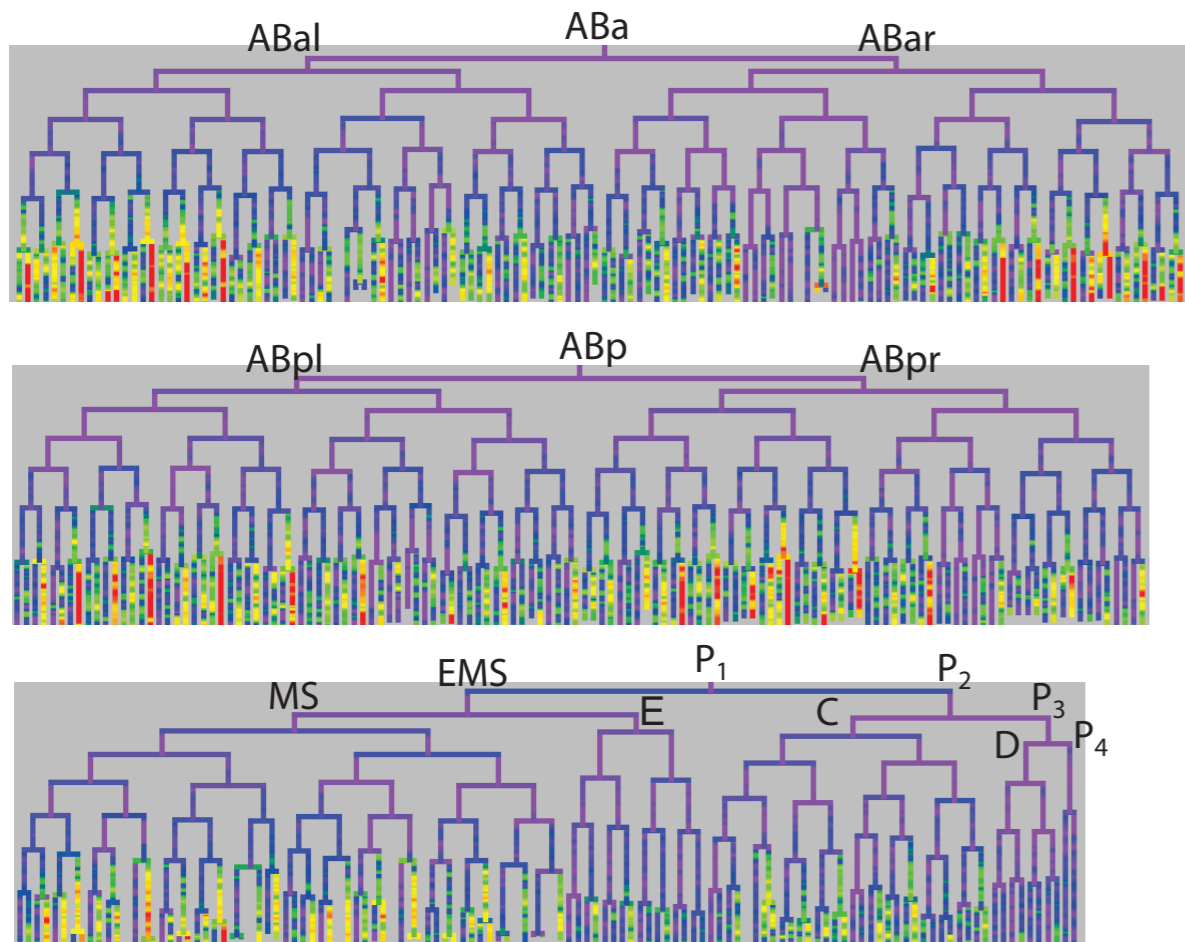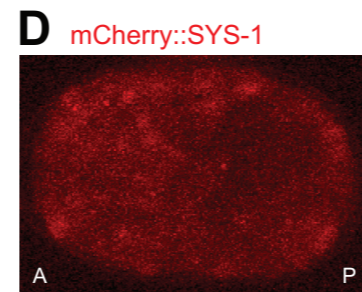

**E** Mean nuclear Psys-1::GFP::POP-1 levels for across all wild-type embryos for full lineage, 350 cell stage

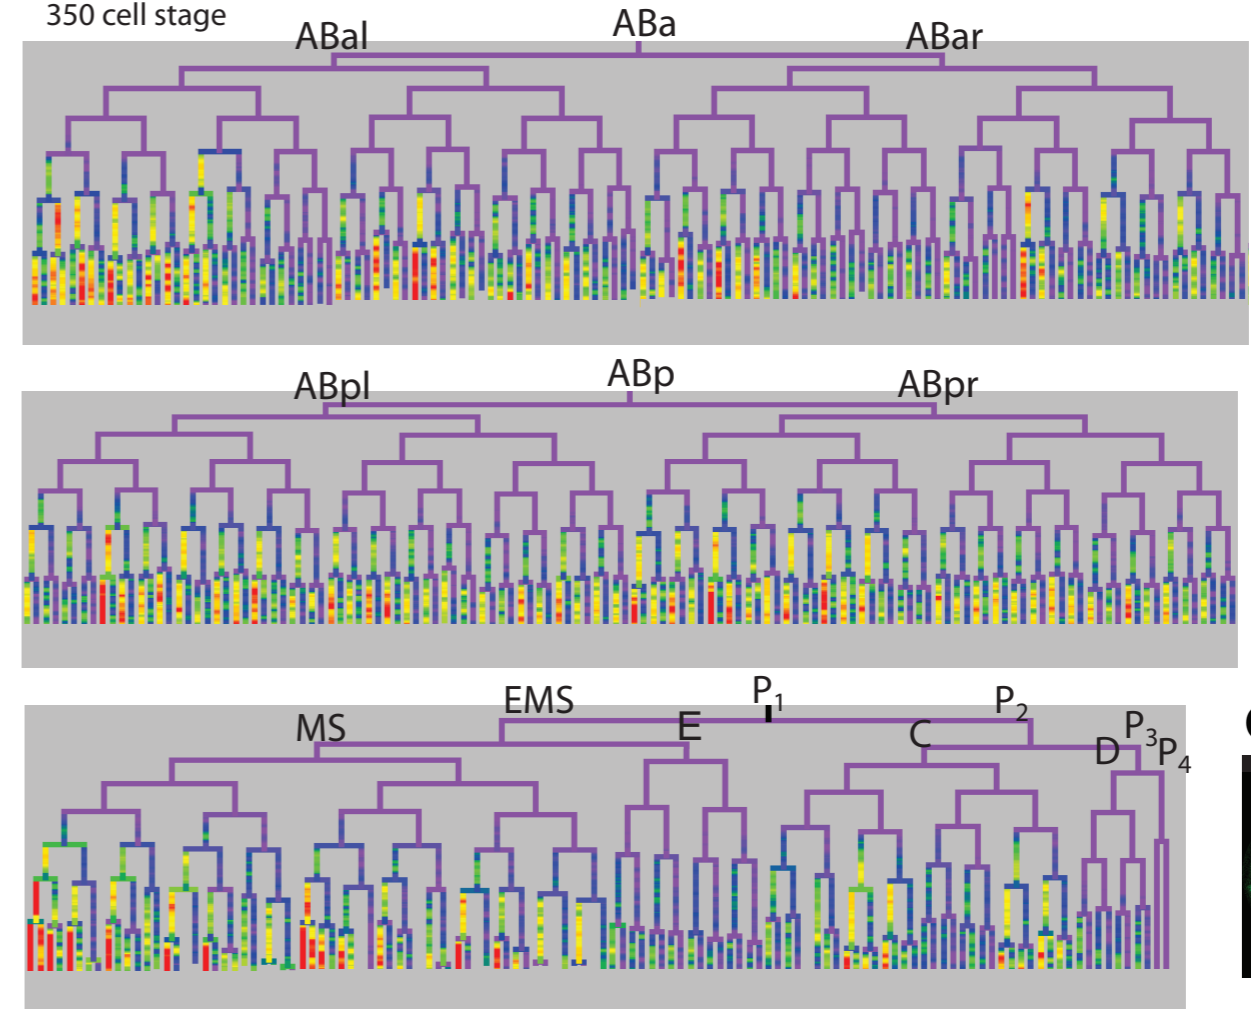

**F** Enhanced detail for ABalaaa

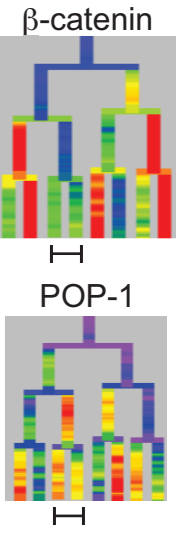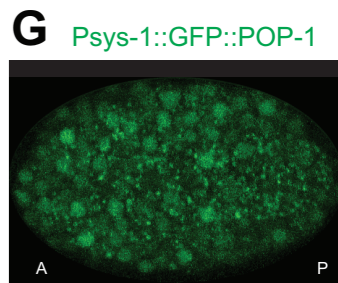

**H** Mean nuclear Venus levels for Psys-1::Venus::SYS-1(stops) in *smg-1(r861)*, 350 cell stage

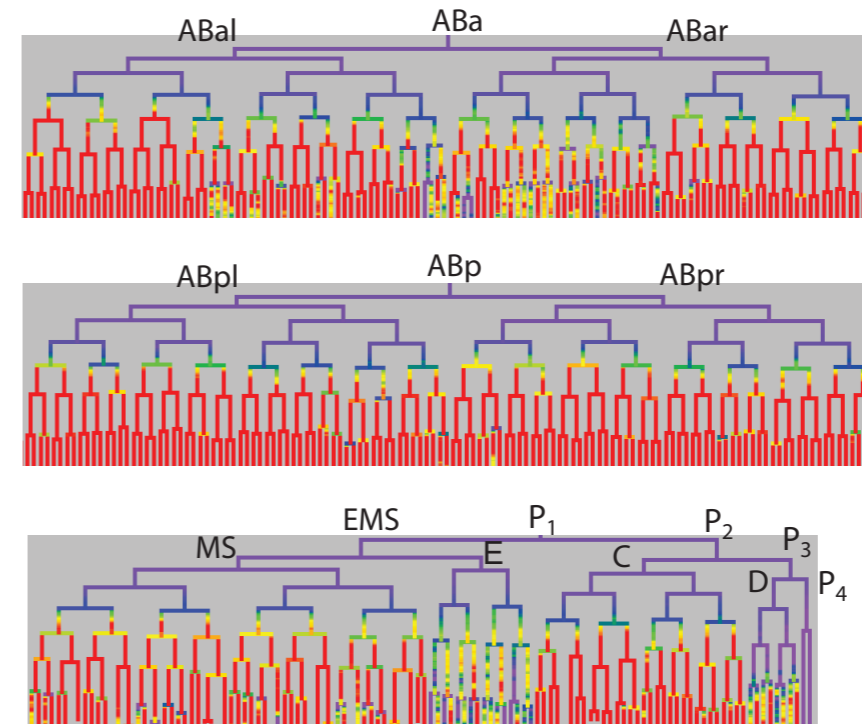

Supplement: pgen.1005585.s007.pdf [file pgen.1005585.s007.pdf]
